# Supplementary material for: Active induction of experimental autoimmune encephalomyelitis by MOG35-55 peptide immunization is associated with differential responses in separate compartments of the choroid plexus
Source: PubMed Central journal article supplement (PMC3493354; doi:10.1186/2045-8118-9-15), 2012-08-07

# Additional file 2

A

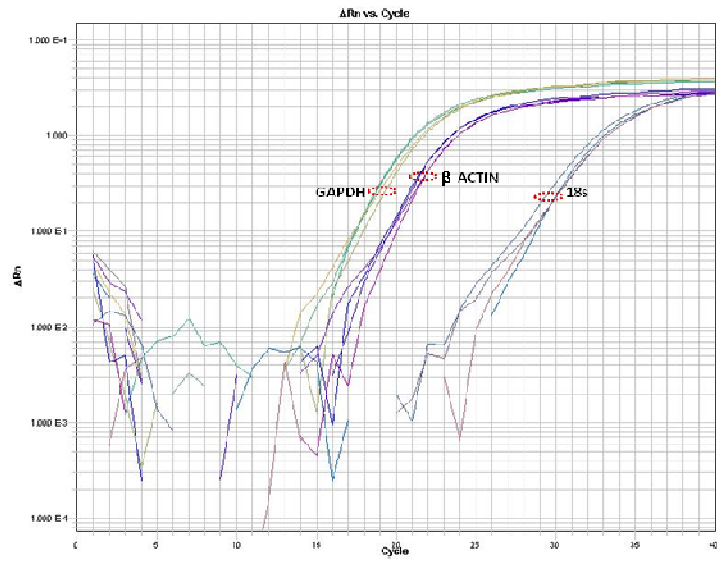

B

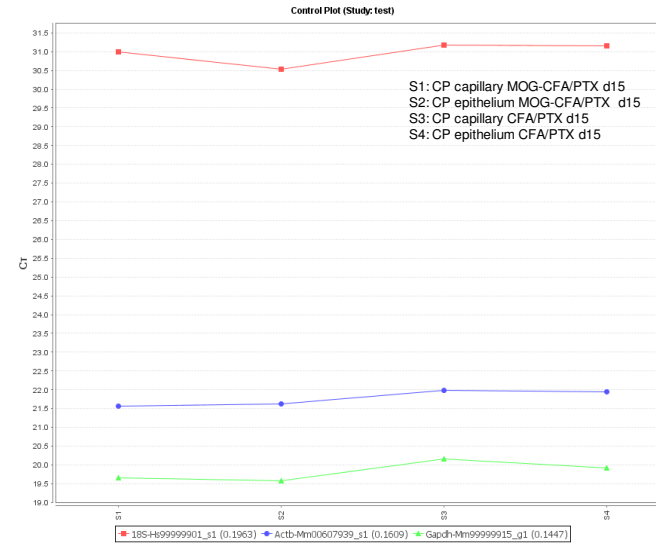

C

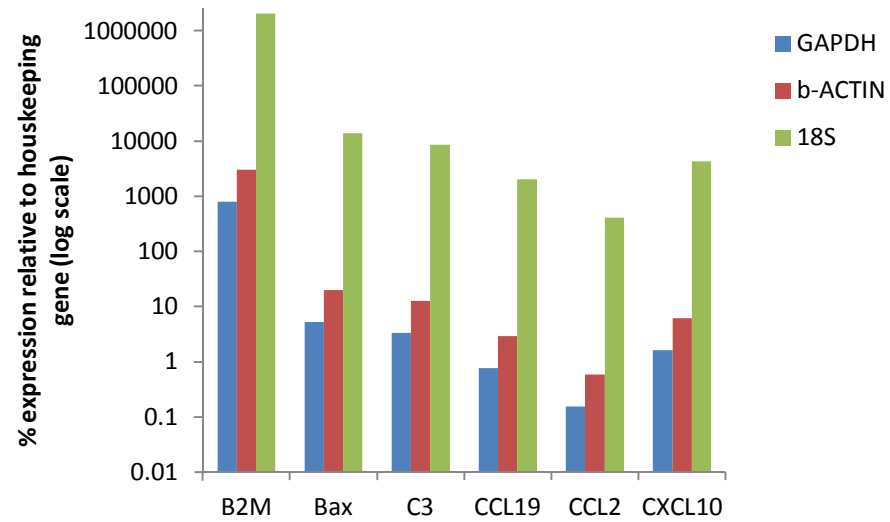

Supplement: 2045-8118-9-15-S2.pdf [file 2045-8118-9-15-S2.pdf]
