# Supplementary material for: Active induction of experimental autoimmune encephalomyelitis by MOG35-55 peptide immunization is associated with differential responses in separate compartments of the choroid plexus
Source: PubMed Central journal article supplement (PMC3493354; doi:10.1186/2045-8118-9-15), 2012-08-07
Supplement: 2045-8118-9-15-S3.pdf [file 2045-8118-9-15-S3.pdf]

### Additional file 3

| <b>Gene</b>   | <b>MOG-CFA/PTX<br/>CP Stromal<br/>capillaries<br/>D15<br/><br/>Avg % expn.<br/>±sem</b> | <b>CFA/PTX<br/>CP Stromal<br/>capillaries<br/>D15<br/><br/>Avg % expn.<br/>±sem</b> | <b>p value</b> |
|---------------|-----------------------------------------------------------------------------------------|-------------------------------------------------------------------------------------|----------------|
| <b>Bax</b>    | 31.79 ± 12.62                                                                           | 3.54 ± 0.89                                                                         | 0.081044       |
| <b>Ccr2</b>   | 8.57 ± 3.26                                                                             | 1.18 ± 0.86                                                                         | 0.077816       |
| <b>Cd68</b>   | 0.83 ± 0.22                                                                             | 0.32 ± 0.066                                                                        | 0.075827       |
| <b>Csf1</b>   | 12.00 ± 4.4                                                                             | 1.82 ± 0.65                                                                         | 0.074886       |
| <b>Cxcl10</b> | 18.20 ± 9.31                                                                            | 0.87 ± 0.21                                                                         | 0.129095       |
| <b>Edn1</b>   | 2.99 ± 1.31                                                                             | 0.35 ± 0.09                                                                         | 0.10678        |
| <b>Fn1</b>    | 19.42 ± 8.42                                                                            | 1.55 ± 0.12                                                                         | 0.093156       |
| <b>Gusb</b>   | 5.94 ± 2.02                                                                             | 1.15 ± 0.09                                                                         | 0.068766       |
| <b>Nfkb2</b>  | 6.42 ± 2.58                                                                             | 0.22 ± 0.08                                                                         | 0.06632        |
| <b>Ski</b>    | 14.44 ± 5.81                                                                            | 2.77 ± 0.65                                                                         | 0.108814       |
| <b>Stat1</b>  | 5.68 ± 1.98                                                                             | 1.12 ± 0.26                                                                         | 0.076147       |
| <b>Tfrc</b>   | 41.32 ± 18.46                                                                           | 4.36 ± 2.12                                                                         | 0.109386       |
| <b>Vcam1</b>  | 27.79 ± 8.66                                                                            | 9.39 ± 3.85                                                                         | 0.108927       |
| <b>Vegfa</b>  | 14.39 ± 5.06                                                                            | 3.53 ± 1.08                                                                         | 0.095283       |
