# Supplementary material for: Active induction of experimental autoimmune encephalomyelitis by MOG35-55 peptide immunization is associated with differential responses in separate compartments of the choroid plexus
Source: PubMed Central journal article supplement (PMC3493354; doi:10.1186/2045-8118-9-15), 2012-08-07
Supplement: 2045-8118-9-15-S4.pdf [file 2045-8118-9-15-S4.pdf]

## Additional file 4

**Genes modulated similarly in CP stromal capillary of MOG-CFA/PTX and CFA/PTX at day 15 p.i.**

| Gene name | Gene name |
|-----------|-----------|
| Agtr2     | Hmox1     |
| Bcl2      | Hprt1     |
| Bcl2l1    | Icos      |
| Ccl2      | Il15      |
| Cd28      | Il18      |
| Cd34      | Il1b      |
| Cd38      | Lrp2      |
| Cd86      | Nfkb1     |
| Cd8a      | Nos2      |
| Col4a5    | Tgfb1     |
| Cxcl11    | Tnf       |
| Cxcr3     | Fasl      |
| H2-Eb1    |           |
