# Supplementary material for: Active induction of experimental autoimmune encephalomyelitis by MOG35-55 peptide immunization is associated with differential responses in separate compartments of the choroid plexus
Source: PubMed Central journal article supplement (PMC3493354; doi:10.1186/2045-8118-9-15), 2012-08-07
Supplement: 2045-8118-9-15-S5.pdf [file 2045-8118-9-15-S5.pdf]

## Additional file 5

| <b>Gene</b>   | <b>MOG-CFA/PTX<br/>CP Epithelium<br/>D9</b> | <b>CFA/PTX<br/>CP Epithelium<br/>D9</b> | <b><i>p</i> value</b> |
|---------------|---------------------------------------------|-----------------------------------------|-----------------------|
|               | <b>Avg % expn. <math>\pm</math>sem</b>      | <b>Avg % expn. <math>\pm</math>sem</b>  |                       |
| <b>C3</b>     | 1.10 $\pm$ 0.63                             | 0.03 $\pm$ 0.002                        | 0.098973              |
| <b>Cd4</b>    | 0.08 $\pm$ 0.03                             | 0.02 $\pm$ 0.0009                       | 0.071996              |
| <b>Cd86</b>   | 0.57 $\pm$ 0.34                             | 0.10 $\pm$ 0.0023                       | 0.156702              |
| <b>Csf1</b>   | 0.53 $\pm$ 0.07                             | 0.42 $\pm$ 0.004                        | 0.101749              |
| <b>Edn1</b>   | 0.23 $\pm$ 0.15                             | 0.01 $\pm$ 0.00006                      | 0.147027              |
| <b>Fas</b>    | 0.13 $\pm$ 0.05                             | 0.05 $\pm$ 0.001                        | 0.07602               |
| <b>Gzmb</b>   | 0.04 $\pm$ 0.02                             | 0.003 $\pm$ 0.0002                      | 0.118426              |
| <b>H2-Eb1</b> | 5.69 $\pm$ 3.17                             | 0.38 $\pm$ 0.02                         | 0.101352              |
| <b>Il1b</b>   | 0.28 $\pm$ 0.14                             | 0.06 $\pm$ 0.007                        | 0.109545              |
| <b>Lrp2</b>   | 1.02 $\pm$ 0.34                             | 0.37 $\pm$ 0.01                         | 0.070257              |
| <b>Ptgs2</b>  | 0.12 $\pm$ 0.06                             | 0.006 $\pm$ 0.0002                      | 0.066443              |
| <b>Ski</b>    | 1.19 $\pm$ 0.26                             | 0.73 $\pm$ 0.03                         | 0.090216              |
| <b>Stat1</b>  | 1.65 $\pm$ 0.60                             | 0.80 $\pm$ 0.02                         | 0.153239              |
| <b>Tgfb1</b>  | 0.92 $\pm$ 0.47                             | 0.20 $\pm$ 0.001                        | 0.126723              |
| <b>Vcam1</b>  | 7.12 $\pm$ 3.31                             | 2.89 $\pm$ 0.10                         | 0.187232              |
