# Supplementary material for: Active induction of experimental autoimmune encephalomyelitis by MOG35-55 peptide immunization is associated with differential responses in separate compartments of the choroid plexus
Source: PubMed Central journal article supplement (PMC3493354; doi:10.1186/2045-8118-9-15), 2012-08-07
Supplement: 2045-8118-9-15-S6.pdf [file 2045-8118-9-15-S6.pdf]

## Additional file 6

**Genes modulated similarly in CP  
Epithelium of MOG-CFA/PTX  
and CFA/PTX at day 9 p.i.**

| Gene name | Gene name |
|-----------|-----------|
| Bcl2l1    | Nfkb1     |
| Ccl3      | Pgk1      |
| Ccl5      | Stat4     |
| Cd68      | Tfrc      |
| Hprt1     | Fasl      |
