# Supplementary material for: Active induction of experimental autoimmune encephalomyelitis by MOG35-55 peptide immunization is associated with differential responses in separate compartments of the choroid plexus
Source: PubMed Central journal article supplement (PMC3493354; doi:10.1186/2045-8118-9-15), 2012-08-07
Supplement: 2045-8118-9-15-S7.pdf [file 2045-8118-9-15-S7.pdf]

**Additional file 7**

| <b>Gene</b>  | <b>MOG-CFA/PTX<br/>CP Epithelium<br/>D15</b> | <b>CFA/PTX<br/>CP Epithelium<br/>D15</b> | <b>p value</b> |
|--------------|----------------------------------------------|------------------------------------------|----------------|
|              | <b>Avg % expn.<br/>±sem</b>                  | <b>Avg % expn.<br/>±sem</b>              |                |
| <b>Bcl2</b>  | 5.33 ± 2.84                                  | 1.44 ± 0.35                              | 0.165387       |
| <b>Ccl2</b>  | 2.49 ± 1.5                                   | 0.043 ± 0.004                            | 0.111899       |
| <b>Ccr2</b>  | 14.64 ± 9.32                                 | 0.75 ± 0.19                              | 0.159383       |
| <b>Ccl5</b>  | 14.34 ± 6.76                                 | 0.84 ± 0.27                              | 0.062775       |
| <b>Cd34</b>  | 8.63 ± 4.01                                  | 1.12 ± 0.36                              | 0.076404       |
| <b>Cd86</b>  | 3.34 ± 1.63                                  | 0.18 ± 0.02                              | 0.069187       |
| <b>Csf1</b>  | 11.07 ± 6.81                                 | 0.60 ± 0.11                              | 0.125791       |
| <b>Ece1</b>  | 2.40 ± 0.64                                  | 0.92 ± 0.33                              | 0.056739       |
| <b>Fas</b>   | 0.55 ± 0.32                                  | 0.09 ± 0.01                              | 0.147418       |
| <b>Hmox1</b> | 4.05 ± 2.12                                  | 1.01 ± 0.16                              | 0.149136       |
| <b>Hprt1</b> | 302.55 ± 180.18                              | 25.81 ± 3.99                             | 0.125903       |
| <b>Il15</b>  | 14.86 ± 7.45                                 | 1.29 ± 0.26                              | 0.081535       |
| <b>Il18</b>  | 3.38 ± 1.35                                  | 1.26 ± 0.34                              | 0.128452       |
| <b>Il1b</b>  | 1.78 ± 1.17                                  | 0.08 ± 0.03                              | 0.143367       |
| <b>Nfkb1</b> | 50.42 ± 24.19                                | 4.26 ± 1.36                              | 0.07184        |
| <b>Stat4</b> | 0.85 ± 0.51                                  | 0.06 ± 0.02                              | 0.121514       |
| <b>Tfrc</b>  | 40.39 ± 21.63                                | 1.12 ± 0.39                              | 0.082216       |
| <b>Vcam1</b> | 15.41 ± 6.32                                 | 3.52 ± 0.49                              | 0.075254       |
| <b>Vegfa</b> | 9.69 ± 5.56                                  | 1.24 ± 0.4                               | 0.129943       |
