# Supplementary material for: Active induction of experimental autoimmune encephalomyelitis by MOG35-55 peptide immunization is associated with differential responses in separate compartments of the choroid plexus
Source: PubMed Central journal article supplement (PMC3493354; doi:10.1186/2045-8118-9-15), 2012-08-07
Supplement: 2045-8118-9-15-S8.pdf [file 2045-8118-9-15-S8.pdf]

## Additional file 8

**Genes modulated similarly in CP  
Epithelium of MOG-CFA/PTX  
and CFA/PTX at day 15 p.i.**

| Gene name |
|-----------|
| Ccl19     |
| Ccr7      |
| Cd4       |
| Cd8a      |
| Cxcr3     |
| Fn1       |
| Sele      |
| Selp      |
